# Supplementary material for: Cholic Acid-Conjugated Methylcellulose-Polyethylenimine Nano-Aggregates for Drug Delivery Systems
Source: PubMed Central journal article supplement (PMC6474074; doi:10.3390/nano9030459), 2019-03-19
Supplement: nanomaterials-09-00459-s001.pdf [file nanomaterials-09-00459-s001.pdf]

# Cholic Acid-conjugated Methylcellulose-Polyethylenimine Nano-aggregates for Drug Delivery Systems

Taewan Kim <sup>1,†</sup>, Jaehong Park <sup>1,†</sup> and Tae-il Kim <sup>1,2,\*</sup>

<sup>1</sup> Department of Biosystems & Biomaterials Science and Engineering, College of Agriculture and Life Sciences, Seoul National University, 1 Gwanak-ro, Gwanak-gu, Seoul, 08826, Korea; tewhan32321@naver.com (T.K.); pjh0520@snu.ac.kr (J.P.)

<sup>2</sup> Research Institute of Agriculture and Life Sciences, Seoul National University, 1 Gwanak-ro, Gwanak-gu, Seoul, 08826, Korea

<sup>†</sup> These authors contributed equally to this work

\* Correspondence: seal1004@snu.ac.kr

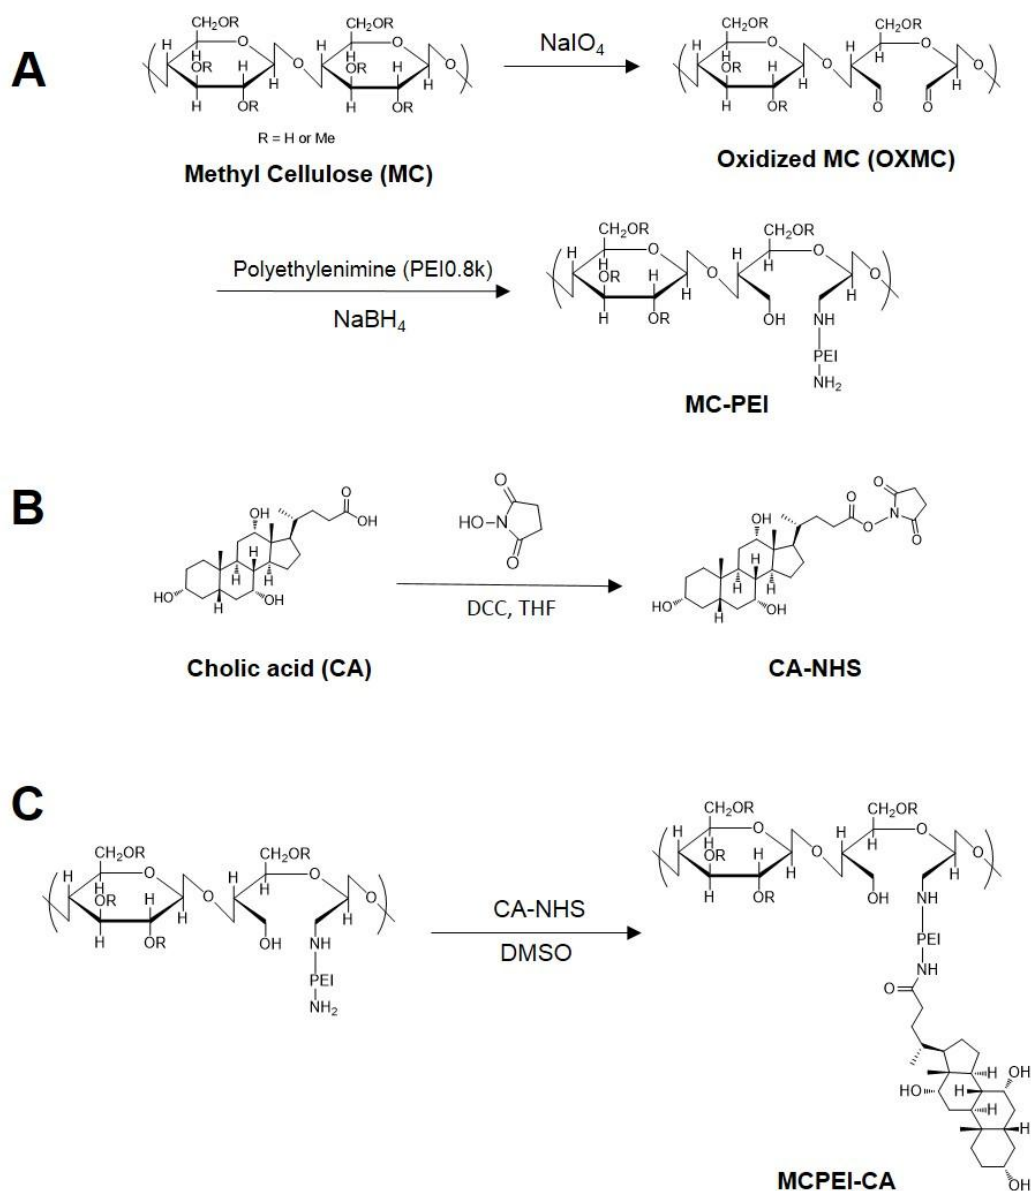

Figure 1. Synthesis scheme of MCPEI-CAs.

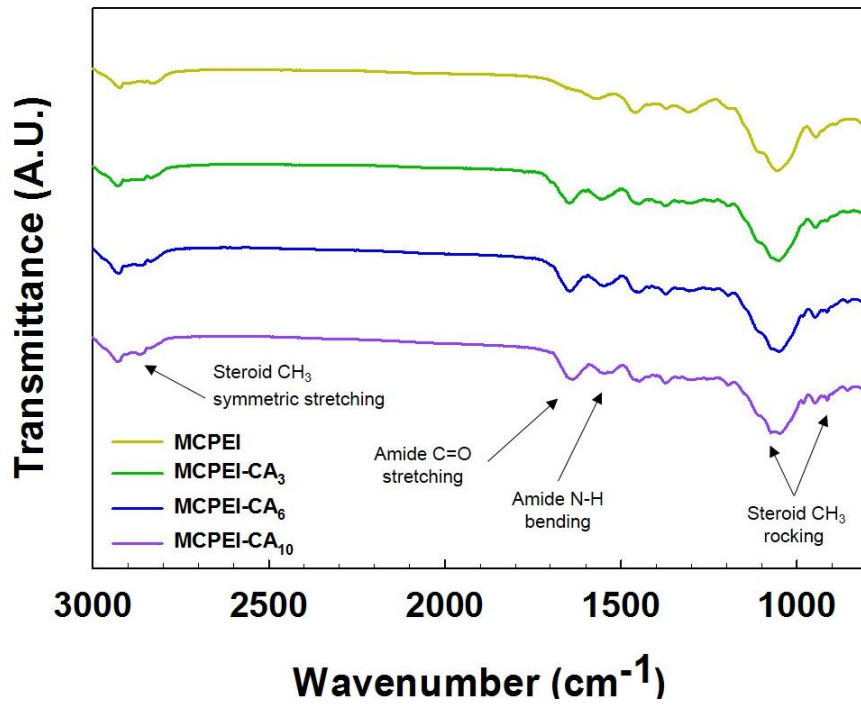

Figure 2. FT-IR spectra of MC-PEI and MCPEI-CAs.

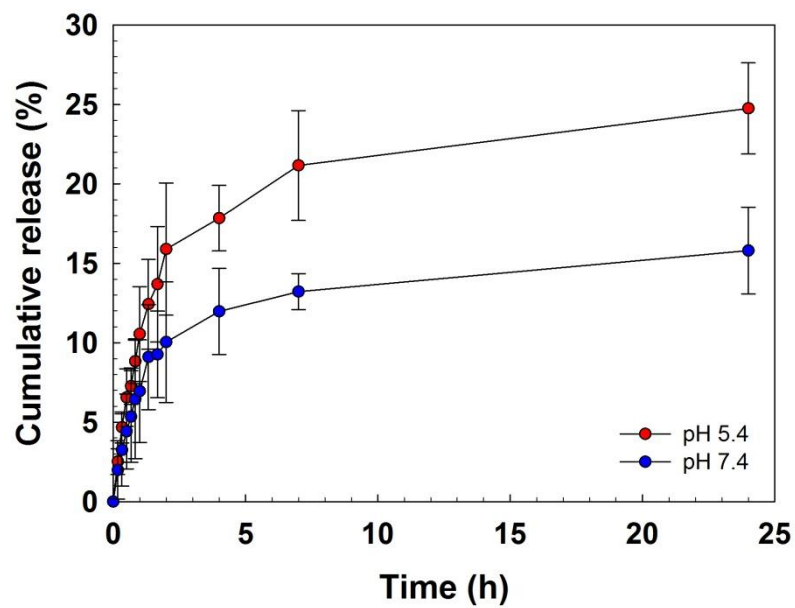

Figure 3. Dox release profile of MCPEI-CA<sub>10</sub> nano-aggregates at pH 5.4 and 7.4.
